# Supplementary material for: LjAMT2;2 Promotes Ammonium Nitrogen Transport during Arbuscular Mycorrhizal Fungi Symbiosis in Lotus japonicus
Source: MDPI journal article supplement (doi:10.3390/ijms23179522), 2022-08-23
Supplement: s1 [file s1]

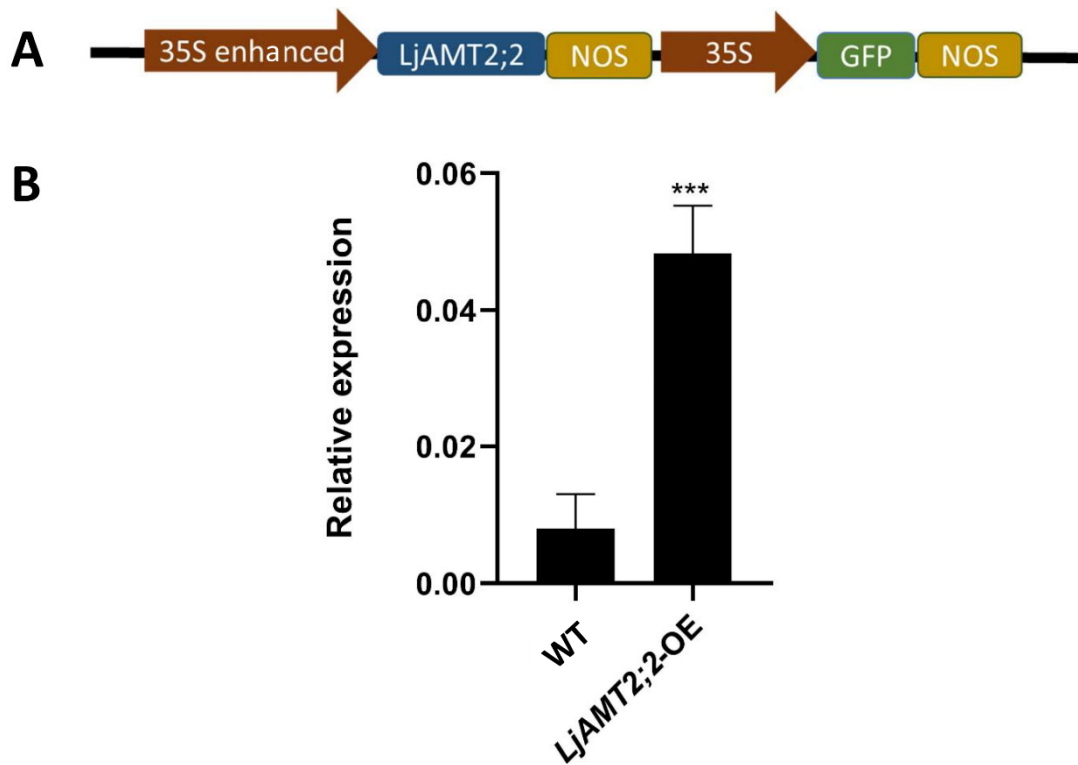

**Figure S1.** Construction of the *LjAMT2;2* overexpression vector and identification of *LjAMT2;2*-OE plants. (A) Construction of the *LjAMT2;2* overexpression vector. (B) Expression of the *LjAMT2;2* gene in *LjAMT2;2*-OE plants. \*\*\*  $p \leq 0.001$ .

**Table S1.** B&D culture medium.

| Reagent                               | Concentration          |
|---------------------------------------|------------------------|
| CaCl <sub>2</sub> •2H <sub>2</sub> O  | 1.0 M                  |
| K <sub>2</sub> HPO <sub>4</sub>       | 0.5 M                  |
| Fe-Citrate                            | 0.01 M                 |
| MgSO <sub>4</sub> •7H <sub>2</sub> O  | 0.25 M                 |
| K <sub>2</sub> SO <sub>4</sub>        | 1.5 M                  |
| KNO <sub>3</sub>                      | 1 M                    |
| MnSO <sub>4</sub> •H <sub>2</sub> O   | 10 <sup>-3</sup> M     |
| H <sub>3</sub> BO <sub>3</sub>        | 2.0×10 <sup>-3</sup> M |
| CuSO <sub>4</sub> •5H <sub>2</sub> O  | 2.0×10 <sup>-4</sup> M |
| CoSO <sub>4</sub> •7H <sub>2</sub> O  | 10 <sup>-4</sup> M     |
| ZnSO <sub>4</sub> •7H <sub>2</sub> O  | 10 <sup>-4</sup> M     |
| NaMoO <sub>4</sub> •2H <sub>2</sub> O | 5×10 <sup>-4</sup> M   |
